# Supplementary material for: Social Inequalities in Cancer Survival in Belgium: A Population-Based Cohort Study
Source: Oxford University Press journal article supplement (doi:10.1158/1055-9965.epi-20-0721), 2020-10-20
Supplement: 243196_2_supp_6600455_qh5znz.xlsx [file 243196_2_supp_6600455_qh5znz.xlsx]

## Sheet: Supp. tab3
Supplementary table S3: Sensitivity analysis: type of income - unadjusted and adjusted hazard ratios (HR) with 95% confidence interval (95% CI) for median neighbourhood-level income, individual income and household income, lung and colon cancer, Belgium 2006-2013
	Lung cancer (n=27 668)				Colon cancer (n=20 149)
Type of income	unadjusted		adjusteda		unadjusted		adjusteda
Active populationb	HR	95% CI	HR	95% CI	HR	95% CI	HR	95% CI
Neighbourhood-level income (ref=high)
Low	1.09	[1.04-1.15]	1.04	[0.99-1.09]	1.14	[1.00-1.29]	1.16	[1.02-1.32]
Middle	1	[0.95-1.06]	0.96	[0.91-1.02]	0.99	[0.86-1.14]	1.15	[1.00-1.33]
Individual income (ref=high)
Low	1.22	[1.15-1.29]	1.21	[1.14-1.29]	1.46	[1.29-1.65]	1.49	[1.31-1.70]
Middle	1.02	[0.95-1.09]	1.05	[0.98-1.13]	1.1	[0.95-1.27]	1.24	[1.07-1.44]
Household income (ref=high)
Low	1.2	[1.13-1.28]	1.14	[1.07-1.22]	1.41	[1.23-1.61]	1.41	[1.23-1.62]
Middle	1.07	[1.00-1.14]	1.05	[0.99-1.12]	1.27	[1.11-1.44]	1.32	[1.16-1.50]
Non-active populationc	HR	95% CI	HR	95% CI	HR	95% CI	HR	95% CI
Neighbourhood-level income (ref=high)
Low	1.1	[1.06-1.14]	1.03	[1.00-1.07]	1.2	[1.14-1.25]	1.12	[1.06-1.17]
Middle	1.03	[0.99-1.07]	1	[0.97-1.05]	1.1	[1.04-1.15]	1.06	[1.01-1.12]
Individual income (ref=high)
Low	1.03	[0.99-1.07]	1.04	[1.01-1.09]	1.12	[1.06-1.18]	1.12	[1.06-1.18]
Middle	1.07	[1.02-1.11]	1.05	[1.01-1.09]	1.16	[1.10-1.23]	1.1	[1.03-1.16]
Household income (ref=high)
Low	1.1	[1.06-1.14]	1.02	[0.98-1.06]	1.16	[1.10-1.22]	1.08	[1.02-1.14]
Middle	1.08	[1.04-1.12]	1.01	[0.97-1.05]	1.22	[1.15-1.28]	1.08	[1.02-1.13]
a HRs were adjusted for age, sex, stage, subtype (only lung cancer), chronic respiratory and cardiovascular comorbidities, diabetes mellitus and primary treatment scheme. b Active population : age < 65 years at diagnosis and non-retired ; c Non-active population : age 65+ at diagnosis or retired
Description : Supplementary table S3 gives the unadjusted and (fully) adjusted hazard ratios with 95% confidence interval for three different income measures (median neighbourhood-level income, individual income and household income) for lung and colon cancer
