# Supplementary material for: Social Inequalities in Cancer Survival in Belgium: A Population-Based Cohort Study
Source: Oxford University Press journal article supplement (doi:10.1158/1055-9965.epi-20-0721), 2020-10-20
Supplement: 243196_2_supp_6600456_qh5znz.xlsx [file 243196_2_supp_6600456_qh5znz.xlsx]

## Sheet: Supp. tab4
Supplementary table S4: Sensitivity analysis : stage at diagnosis and comorbidities - adjusted hazard ratios (HR) with 95% confidence interval (95% CI) for socioeconomic (SE) and sociodemographic (SD) factors by cancer type, Belgium 2006-2013
	Breast (n=33 644)				Colon (n=20 149)				Rectum (n=8 174)				Head and neck (n=7 304)
SE or SD factors	adjusteda		adjustedb		adjusteda		adjustedb		adjusteda		adjustedb		adjusteda		adjustedb
Active populationc	HR	95% CI	HR	95% CI	HR	95% CI	HR	95% CI	HR	95% CI	HR	95% CI	HR	95% CI	HR	95% CI
Household income (ref=high)
Low	1.57	[1.38-1.77]	1.65	[1.48-1.85]	1.41	[1.23-1.62]	1.4	[1.22-1.61]	1.45	[1.20-1.75]	1.43	[1.19-1.72]	1.85	[1.65-2.07]	1.95	[1.74-2.19]
Middle	1.17	[1.04-1.32]	1.24	[1.11-1.38]	1.32	[1.16-1.50]	1.31	[1.15-1.48]	1.11	[0.93-1.34]	1.16	[0.97-1.39]	1.44	[1.27-1.63]	1.5	[1.33-1.70]
Employment status (ref=working)
Disabled/other (unemployed)	1.69	[1.51-1.89]	1.38	[1.17-1.63]	1.46	[1.28-1.67]	1.55	[1.36-1.77]	1.65	[1.38-1.98]	1.69	[1.41-2.01]	1.78	[1.61-1.97]	1.78	[1.56-2.04]
Job-seeking (unemployed)	1.5	[1.25-1.81]	1.87	[1.69-2.07]	1.64	[1.34-2.02]	1.43	[1.17-1.75]	1.63	[1.23-2.18]	1.53	[1.15-2.03]	1.73	[1.51-1.98]	1.85	[1.67-2.04]
Non-active populationd	HR	95% CI	HR	95% CI	HR	95% CI	HR	95% CI	HR	95% CI	HR	95% CI	HR	95% CI	HR	95% CI
Household income (ref=high)
Low	1.05	[0.97-1.13]	1.12	[1.05-1.20]	1.08	[1.02-1.14]	1.09	[1.03-1.14]	1.05	[0.97-1.15]	1.07	[0.98-1.17]	1.24	[1.12-1.37]	1.23	[1.12-1.37]
Middle	1.05	[0.97-1.13]	1.08	[1.01-1.16]	1.08	[1.02-1.13]	1.08	[1.02-1.13]	1.06	[0.97-1.16]	1.05	[0.96-1.15	1.09	[0.98-1.22]	1.1	[0.99-1.22]
Overall	HR	95% CI	HR	95% CI	HR	95% CI	HR	95% CI	HR	95% CI	HR	95% CI	HR	95% CI	HR	95% CI
Marital statuse (ref=cohabitating)
Separated	1.23	[1.10-1.37]	1.24	[1.12-1.38]	1.28	[1.16-1.40]	1.31	[1.19-1.44]	1.2	[1.04-1.38]	1.23	[1.07-1.41]	1.35	[1.22-1.49]	1.37	[1.24-1.52]
Single	1.35	[1.19-1.52]	1.36	[1.21-1.53]	1.37	[1.24-1.53]	1.46	[1.31-1.62]	1.36	[1.15-1.61]	1.34	[1.14-1.58]	1.53	[1.34-1.75]	1.51	[1.33-1.72]
Widowed	1.16	[1.07-1.27]	1.19	[1.09-1.29]	1.1	[1.03-1.18]	1.18	[1.10-1.26]	1.08	[0.96-1.22]	1.13	[1.00-1.27]	1.51	[1.32-1.73]	1.51	[1.32-1.72]
	Lung (n=27 668)				Ovary (n=3 394)				Pancreas (n=4 737)				Stomach (n=4 521)
SE and SD factors	adjusteda		adjustedb		adjusteda		adjustedb		adjusteda		adjustedb		adjusteda		adjustedb
Active populationc	HR	95% CI	HR	95% CI	HR	95% CI	HR	95% CI	HR	95% CI	HR	95% CI	HR	95% CI	HR	95% CI
Household income (ref=high)
Low	1.14	[1.07-1.22]	1.12	[1.05-1.19]	0.99	[0.80-1.23]	1.03	[0.84-1.27]	1.27	[1.08-1.48]	1.19	[1.02-1.39]	1.27	[1.05-1.54]	1.14	[0.94-1.38]
Middle	1.05	[0.99-1.12]	1.03	[0.97-1.10]	1.04	[0.85-1.26]	1	[0.83-1.22]	1.06	[0.89-1.25]	1.02	[0.87-1.21]	1.03	[0.84-1.25]	0.97	[0.80-1.17]
Employment status (ref=working)
Disabled/other (unemployed)	1.25	[1.18-1.32]	1.22	[1.16-1.30]	1.17	[0.96-1.42]	1.16	[0.86-1.55]	1.31	[1.11-1.55]	1.15	[0.98-1.36]	1.09	[0.89-1.33]	1.09	[0.90-1.32]
Job-seeking (unemployed)	1.15	[1.05-1.25]	1.12	[1.03-1.23]	1.11	[0.83-1.49]	1.14	[0.95-1.39]	1.46	[1.16-1.83]	1.45	[1.16-1.81]	1.36	[1.04-1.78]	1.29	[0.99-1.67]
Non-active populationd	HR	95% CI	HR	95% CI	HR	95% CI	HR	95% CI	HR	95% CI	HR	95% CI	HR	95% CI	HR	95% CI
Household income (ref=high)
Low	1.02	[0.98-1.06]	1.02	[0.98-1.06]	1.1	[0.97-1.24]	1.05	[0.93-1.18]	1.07	[0.99-1.17]	1.09	[1.00-1.18]	0.89	[0.81-0.97]	0.91	[0.83-1.00]
Middle	1.01	[0.97-1.05]	1	[0.96-1.04]	1.05	[0.93-1.20]	1.03	[0.91-1.18]	1.13	[1.04-1.23]	1.14	[1.04-1.24]	0.95	[0.86-1.05]	0.93	[0.84-1.02]
Overall	HR	95% CI	HR	95% CI	HR	95% CI	HR	95% CI	HR	95% CI	HR	95% CI	HR	95% CI	HR	95% CI
Marital statuse (ref=cohabitating)
Separated	1.15	[1.09-1.20]	1.13	[1.08-1.19]	1.02	[0.85-1.23]	1.03	[0.86-1.24]	1.09	[0.97-1.23]	1.1	[0.98-1.24]	1.26	[1.09-1.46]	1.22	[1.05-1.41]
Single	1.16	[1.09-1.24]	1.14	[1.07-1.22]	1.35	[1.10-1.65]	1.25	[1.03-1.53]	1.26	[1.08-1.46]	1.26	[1.08-1.46]	1.17	[0.98-1.39]	1.28	[1.08-1.52]
Widowed	1.14	[1.09-1.19]	1.12	[1.07-1.17]	1.01	[0.87-1.17]	1	[0.86-1.15]	1.15	[1.04-1.28]	1.12	[1.01-1.25]	1.18	[1.05-1.33]	1.19	[1.06-1.34]
a HRs were adjusted for age, sex (if applicable), stage, subtype (if applicable), chronic respiratory and cardiovascular comorbidities, diabetes mellitus and primary treatment scheme; b HRs were only adjusted for age, sex,subtype and primary treatment scheme. c Active population : age < 65 years at diagnosis and non-retired ; d Non-active population : age 65+ years at diagnosis or retired. e Mari…
