# Supplementary material for: Social Inequalities in Cancer Survival in Belgium: A Population-Based Cohort Study
Source: Oxford University Press journal article supplement (doi:10.1158/1055-9965.epi-20-0721), 2020-10-20
Supplement: 243196_2_supp_6600458_qh5znz.xlsx [file 243196_2_supp_6600458_qh5znz.xlsx]

## Sheet: Supp. tab5
Supplementary table S5: Sensitivity analysis: primary treatment scheme - adjusted hazard ratios (HR) with 95% confidence interval (95%-CI) for socioeconomic (SE) and sociodemographic (SD) factors, lung and colon cancer, Belgium 2006-2013
	Lung cancer (n=27 668)				Colon cancer (n=20 149)
SE and SD factors	adjusteda		adjustedb		adjusteda		adjustedb
Active populationc	HR	95% CI	HR	95% CI	HR	95% CI	HR	95% CI
Household income (ref=high)
Low	1.2	[1.13-1.28]	1.14	[1.07-1.22]	1.39	[1.21-1.59]	1.41	[1.23-1.62]
Middle	1.1	[1.03-1.17]	1.05	[0.99-1.12]	1.27	[1.11-1.44]	1.32	[1.16-1.50]
Employment status (ref=working)
Disabled/other (unemployed)	1.33	[1.25-1.41]	1.25	[1.18-1.32]	1.52	[1.34-1.74]	1.46	[1.28-1.67]
Job-seeking (unemployed)	1.23	[1.13-1.34]	1.15	[1.05-1.25]	1.73	[1.42-2.12]	1.64	[1.34-2.02]
Non-active populationd	HR	95% CI	HR	95% CI	HR	95% CI	HR	95% CI
Household income (ref=high)
Low	1.02	[0.98-1.06]	1.02	[0.98-1.06]	1.09	[1.03-1.15]	1.08	[1.02-1.14]
Middle	1	[0.97-1.04]	1.01	[0.97-1.05]	1.1	[1.04-1.15]	1.08	[1.02-1.13]
Overall	HR	95% CI	HR	95% CI	HR	95% CI	HR	95% CI
Marital statuse (ref=cohabitating)
Separated	1.18	[1.13-1.24]	1.15	[1.09-1.20]	1.28	[1.17-1.41]	1.28	[1.16-1.40]
Single	1.27	[1.19-1.36]	1.16	[1.09-1.24]	1.52	[1.37-1.69]	1.37	[1.24-1.53]
Widowed	1.21	[1.16-1.27]	1.14	[1.09-1.19]	1.15	[1.08-1.23]	1.1	[1.03-1.18]
a HRs were adjusted for age, gender, stage, subtype (only lung cancer), chronic respiratory and cardiovascular comorbidities and diabetes mellitus; b HRs were additionally adjusted for primary treatment scheme. c Active population : age < 65 years at diagnosis and non-retired ; d Non-active population : age 65+ years at diagnosis or retired. e Marital status was only available for incidence years…
Description: Supplementary table S5 gives the adjusted hazard ratios with 95% confidence interval for socioeconomic and -demographic factors for lung and colon cancer (a: model without primary treatment, b: fully adjusted model).
